# Supplementary material
Source: ML conference proceedings conference paper supplement (https://proceedings.neurips.cc/paper_files/paper/2019/hash/9d63484abb477c97640154d40595a3bb-Abstract.html)
Supplement: Supplementary file [file 9d63484abb477c97640154d40595a3bb-Supplemental.zip]

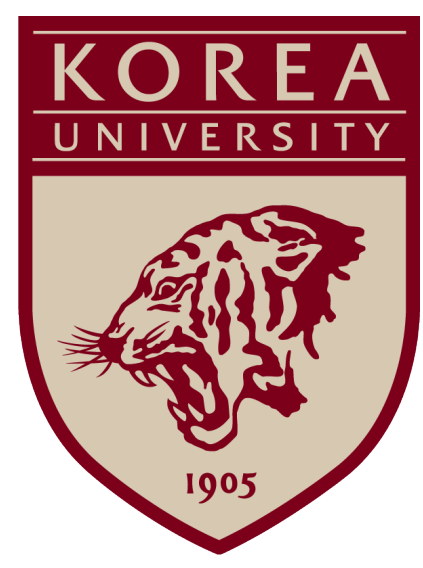

# Graph Transformer Networks

Seoungjun Yun, Minbyul Jeong, Raehyun Kim, Jaewoo Kang\*, Hyunwoo J. Kim\*  
Department of Computer Science and Engineering, Korea University, Seoul, Korea  
{ ysj5419, minbyuljeong, raehyun, kangj, hyunwoojkim } @ korea.ac.kr

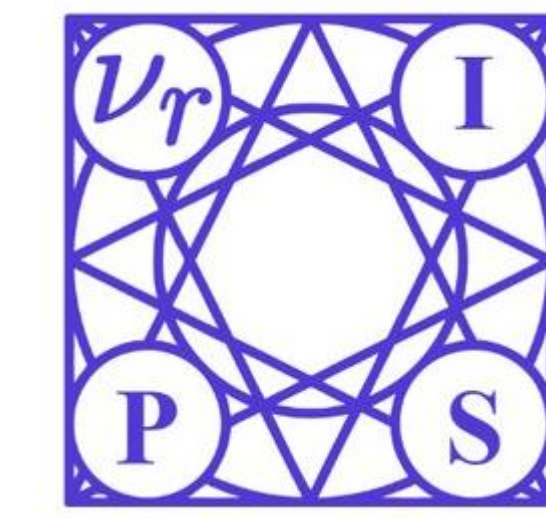

## Background & Motivations

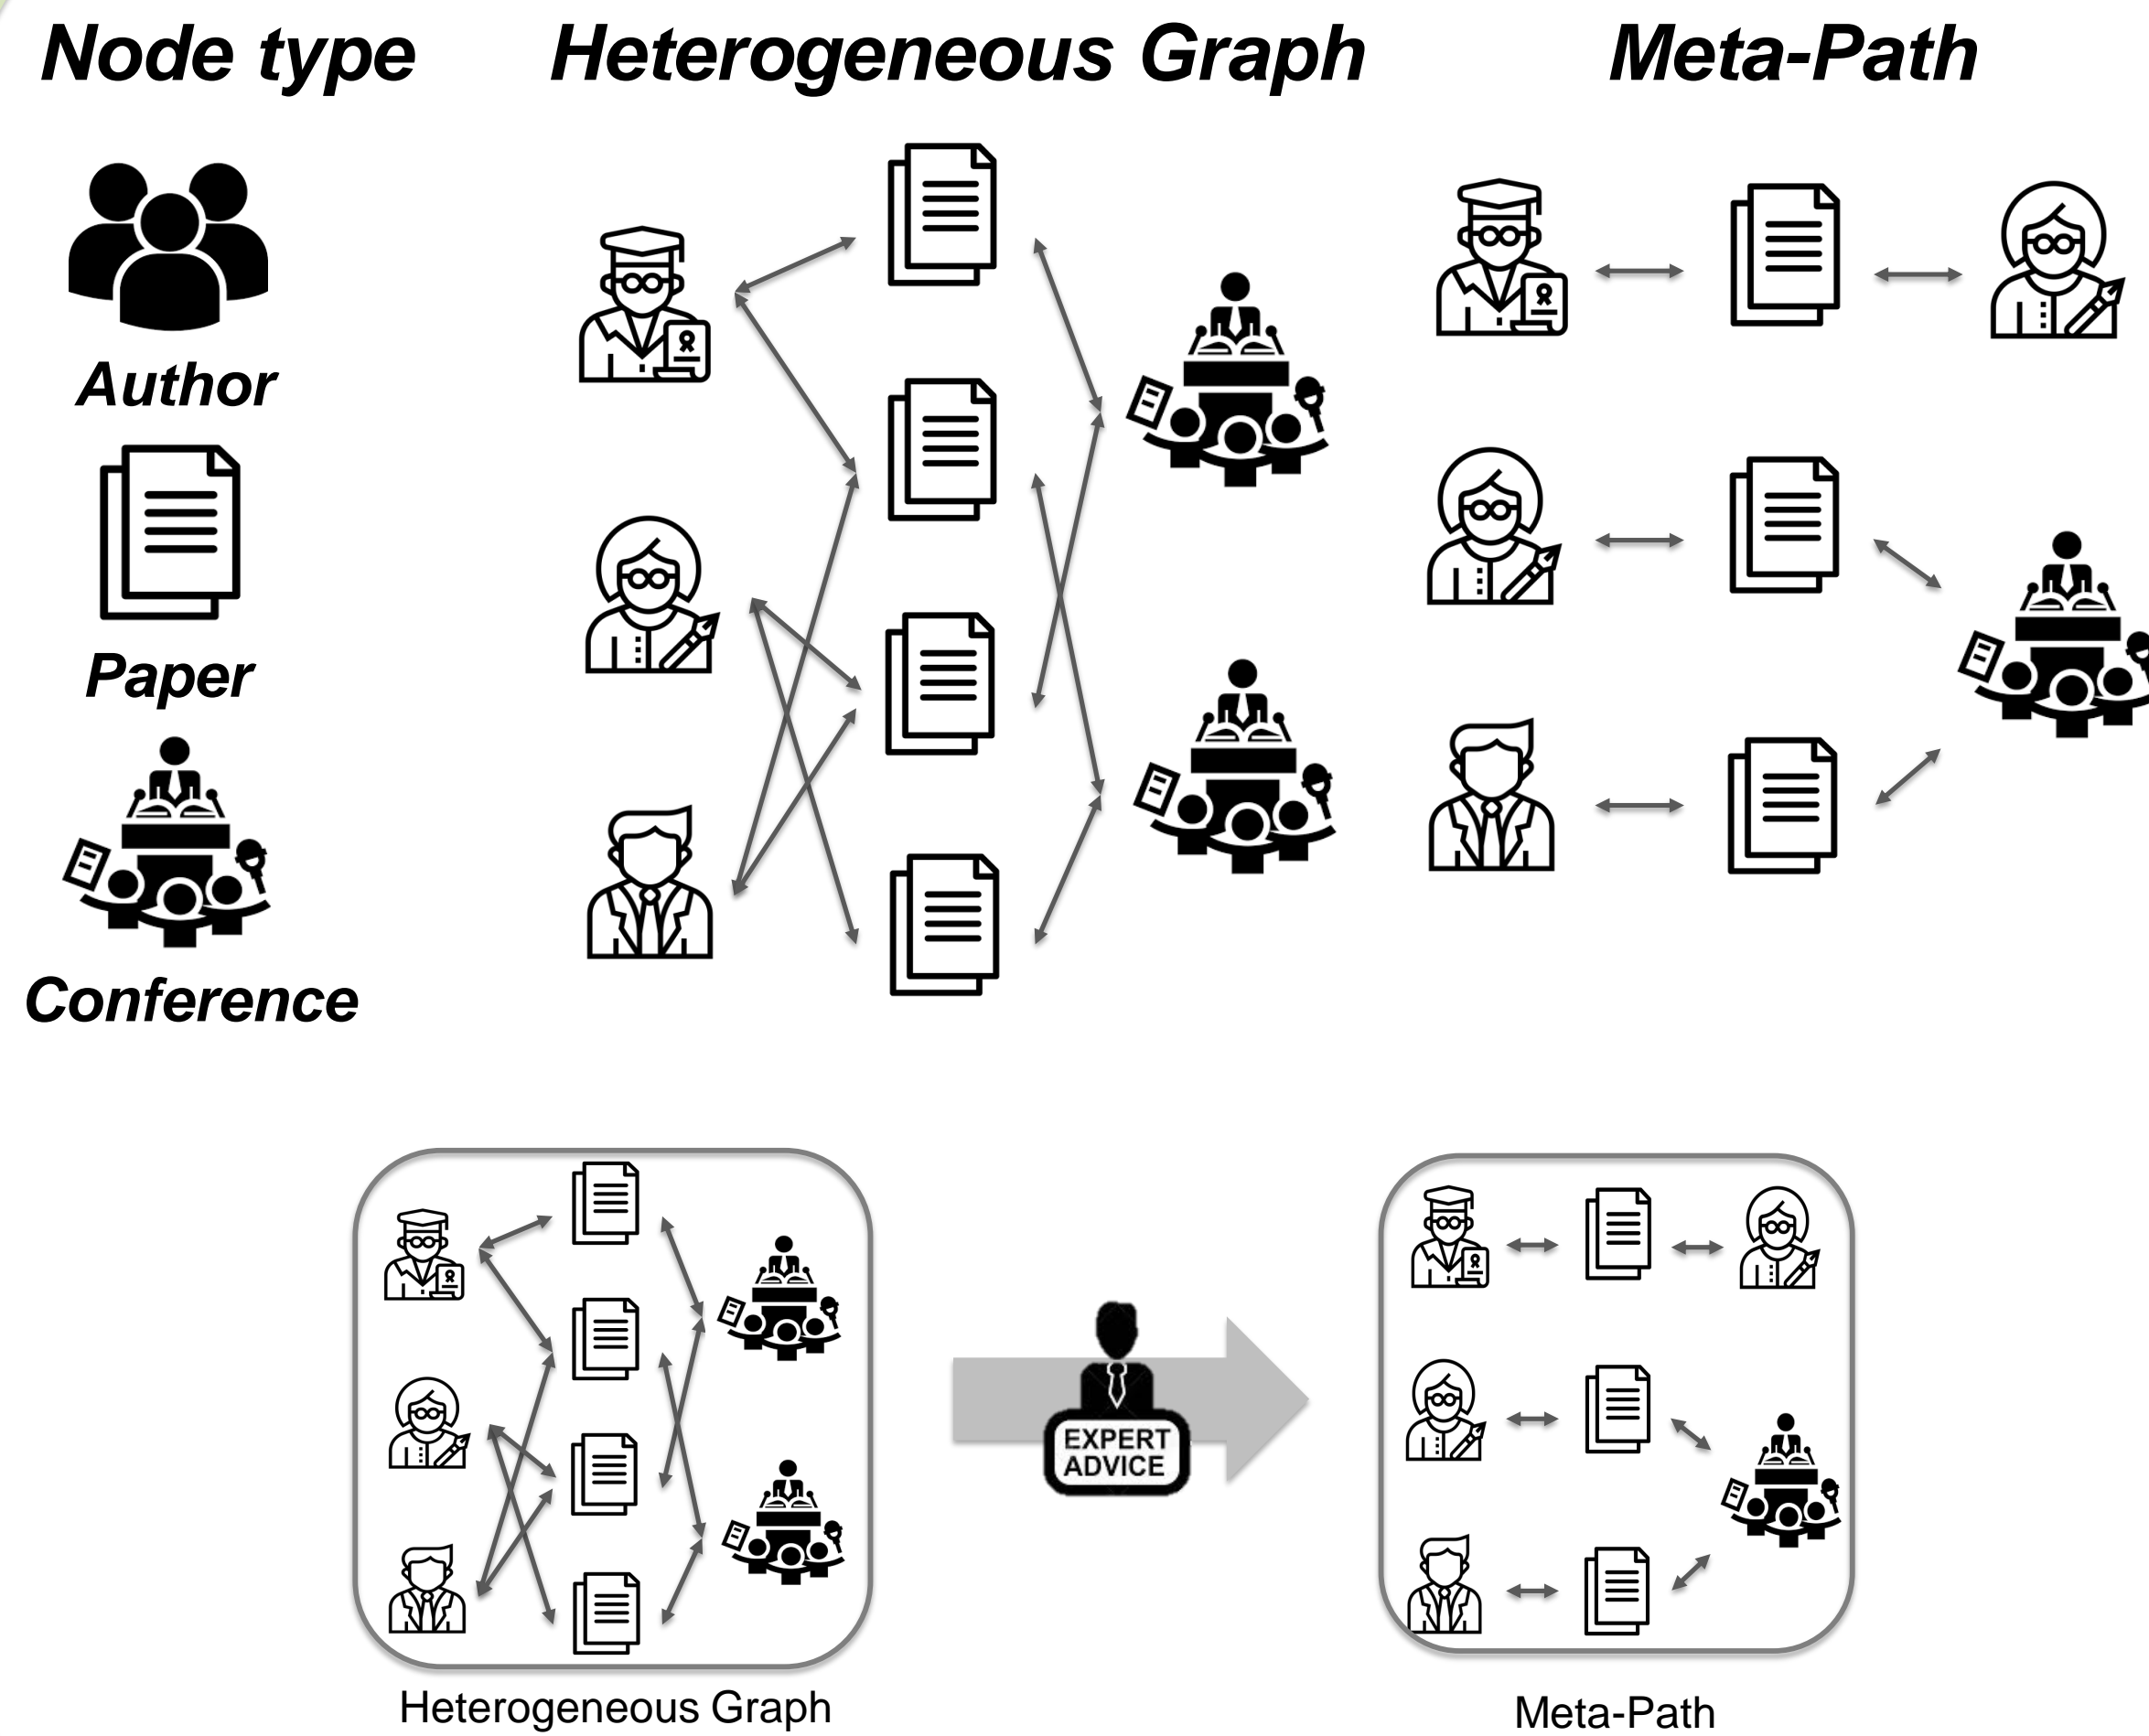

## Contributions

1. We propose a novel framework **Graph Transformer Networks**, to **learn a new graph structure** which involves identifying useful meta-paths and multi-hop connections for learning effective node representation on graphs.
2. The graph generation is **interpretable** and the model is able to provide insight on **effective meta-paths** for prediction.
3. We prove the effectiveness of node representation learnt by Graph Transformer Networks resulting in **the best performance** against state-of-the-art methods that additionally use domain knowledge in all three benchmark **node classification on heterogeneous graphs**.

## Our Approach

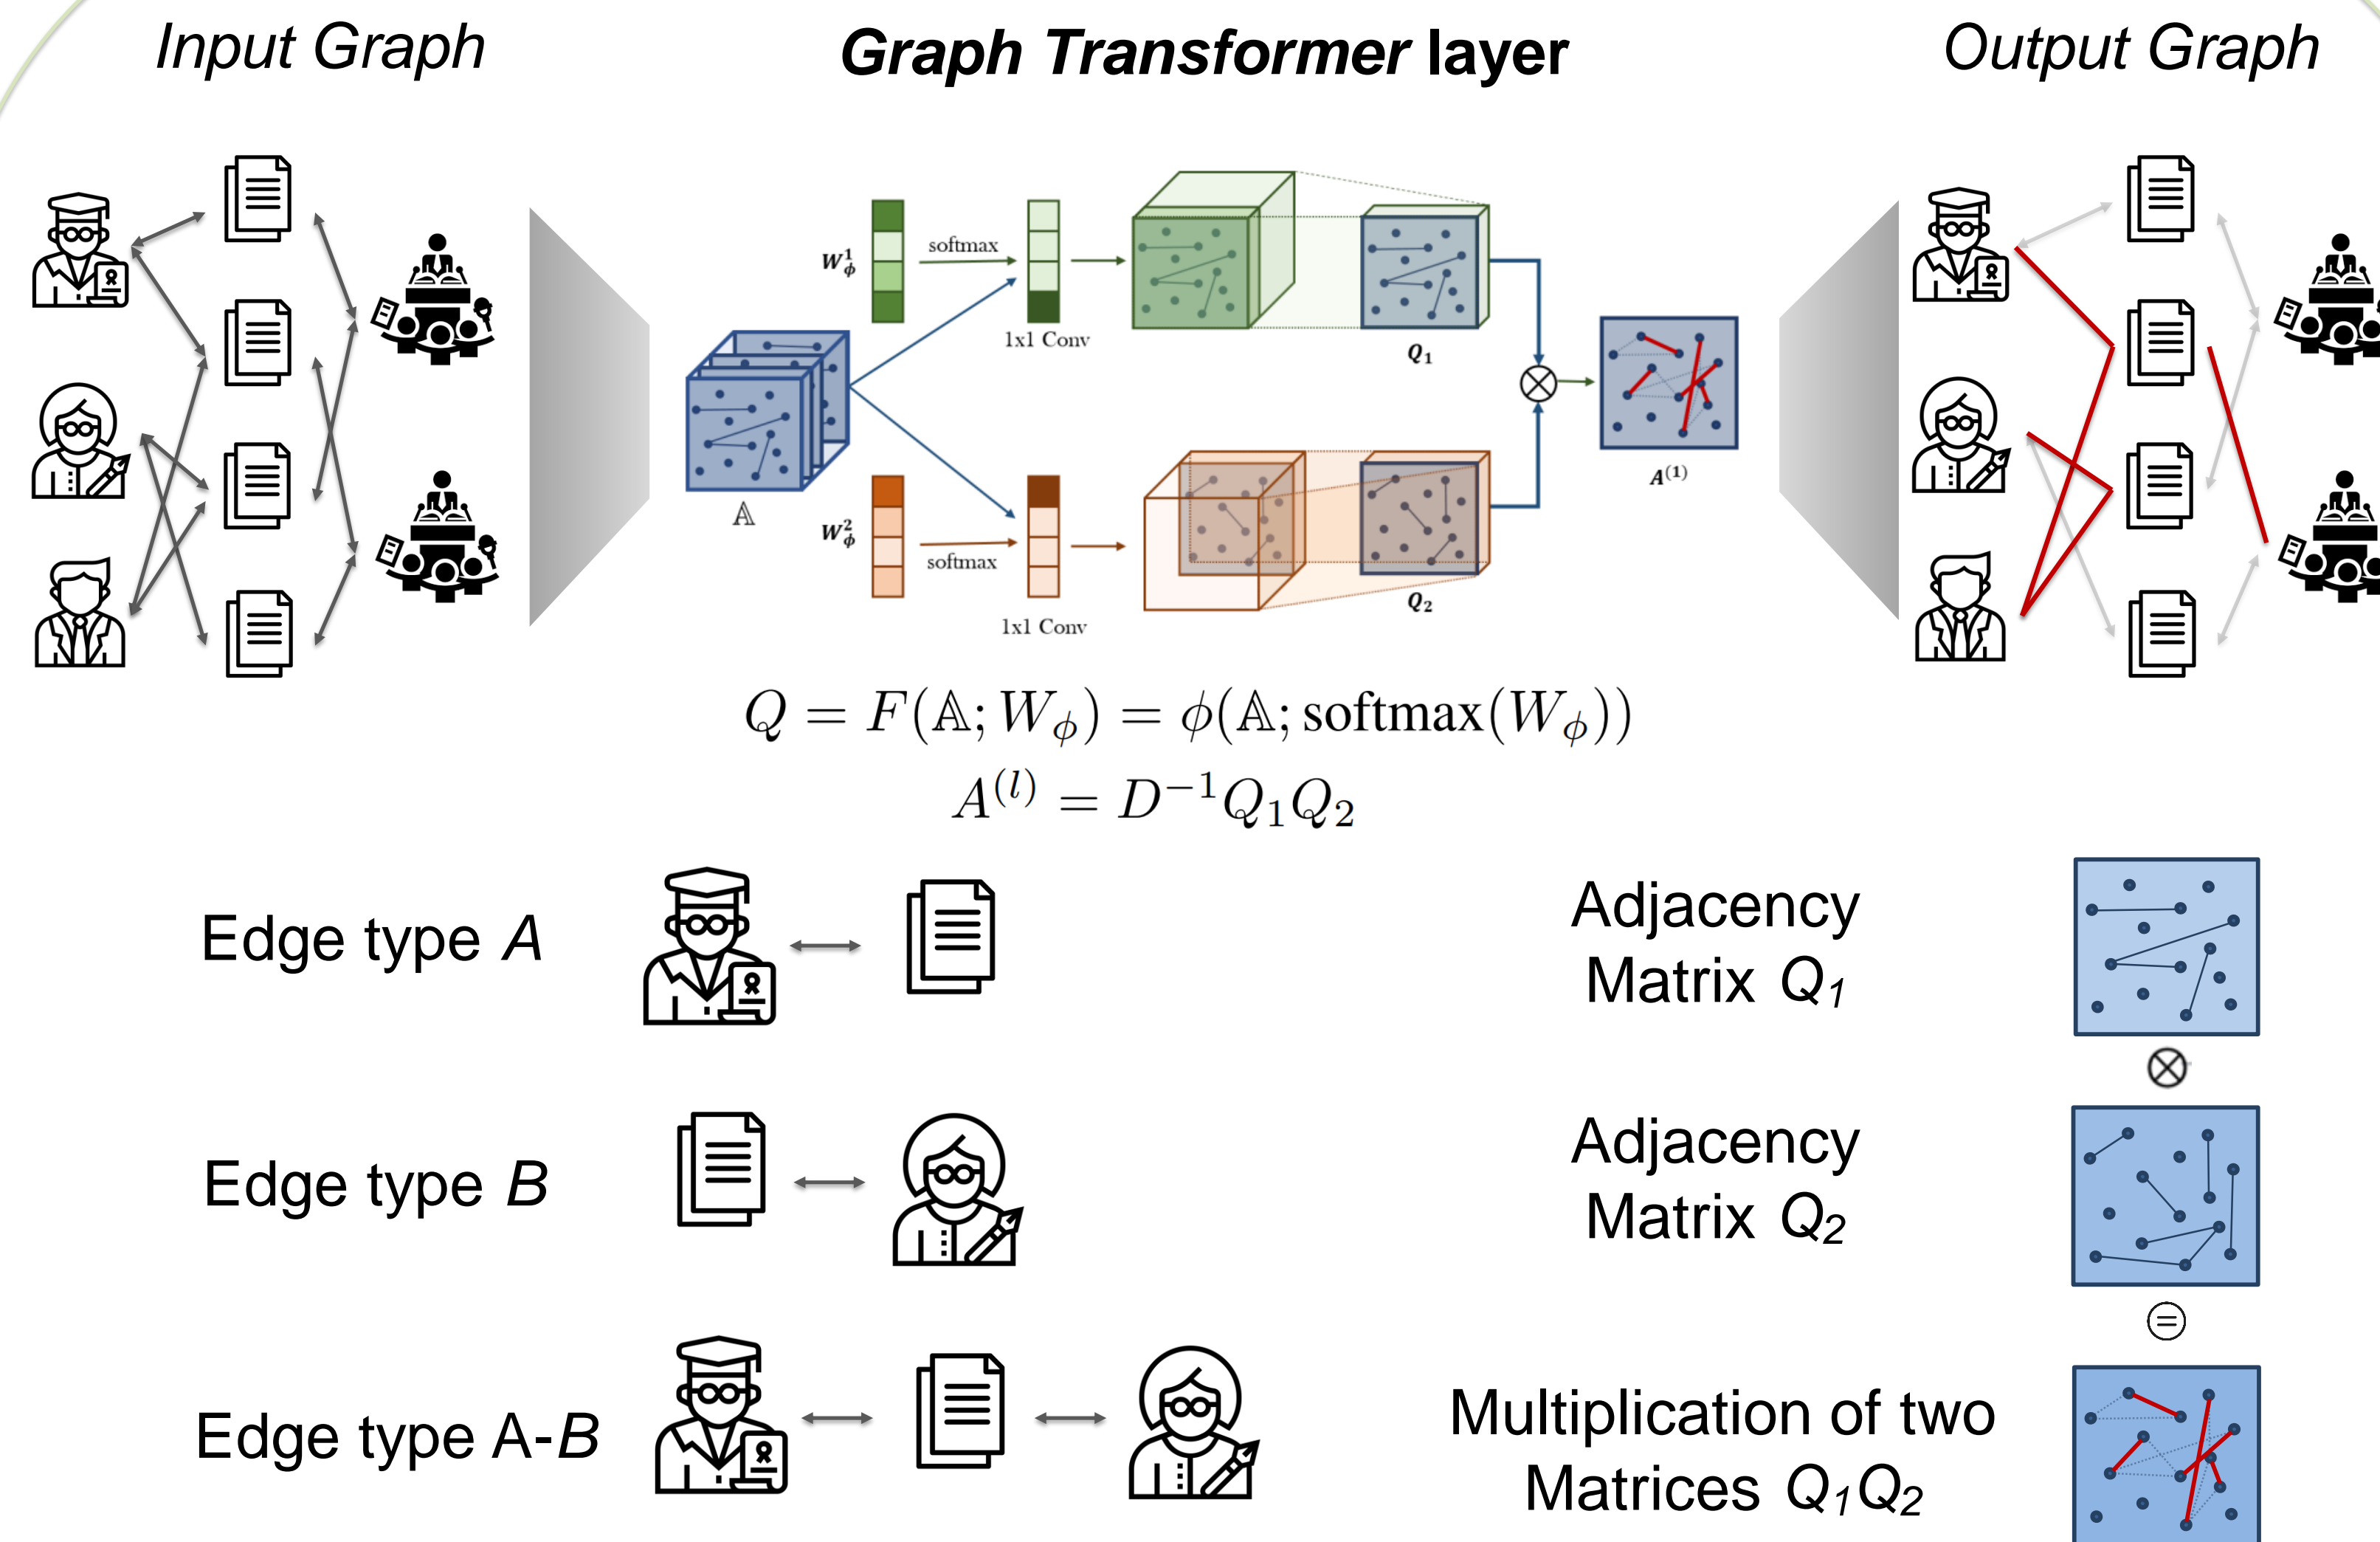

## Graph Transformer Networks

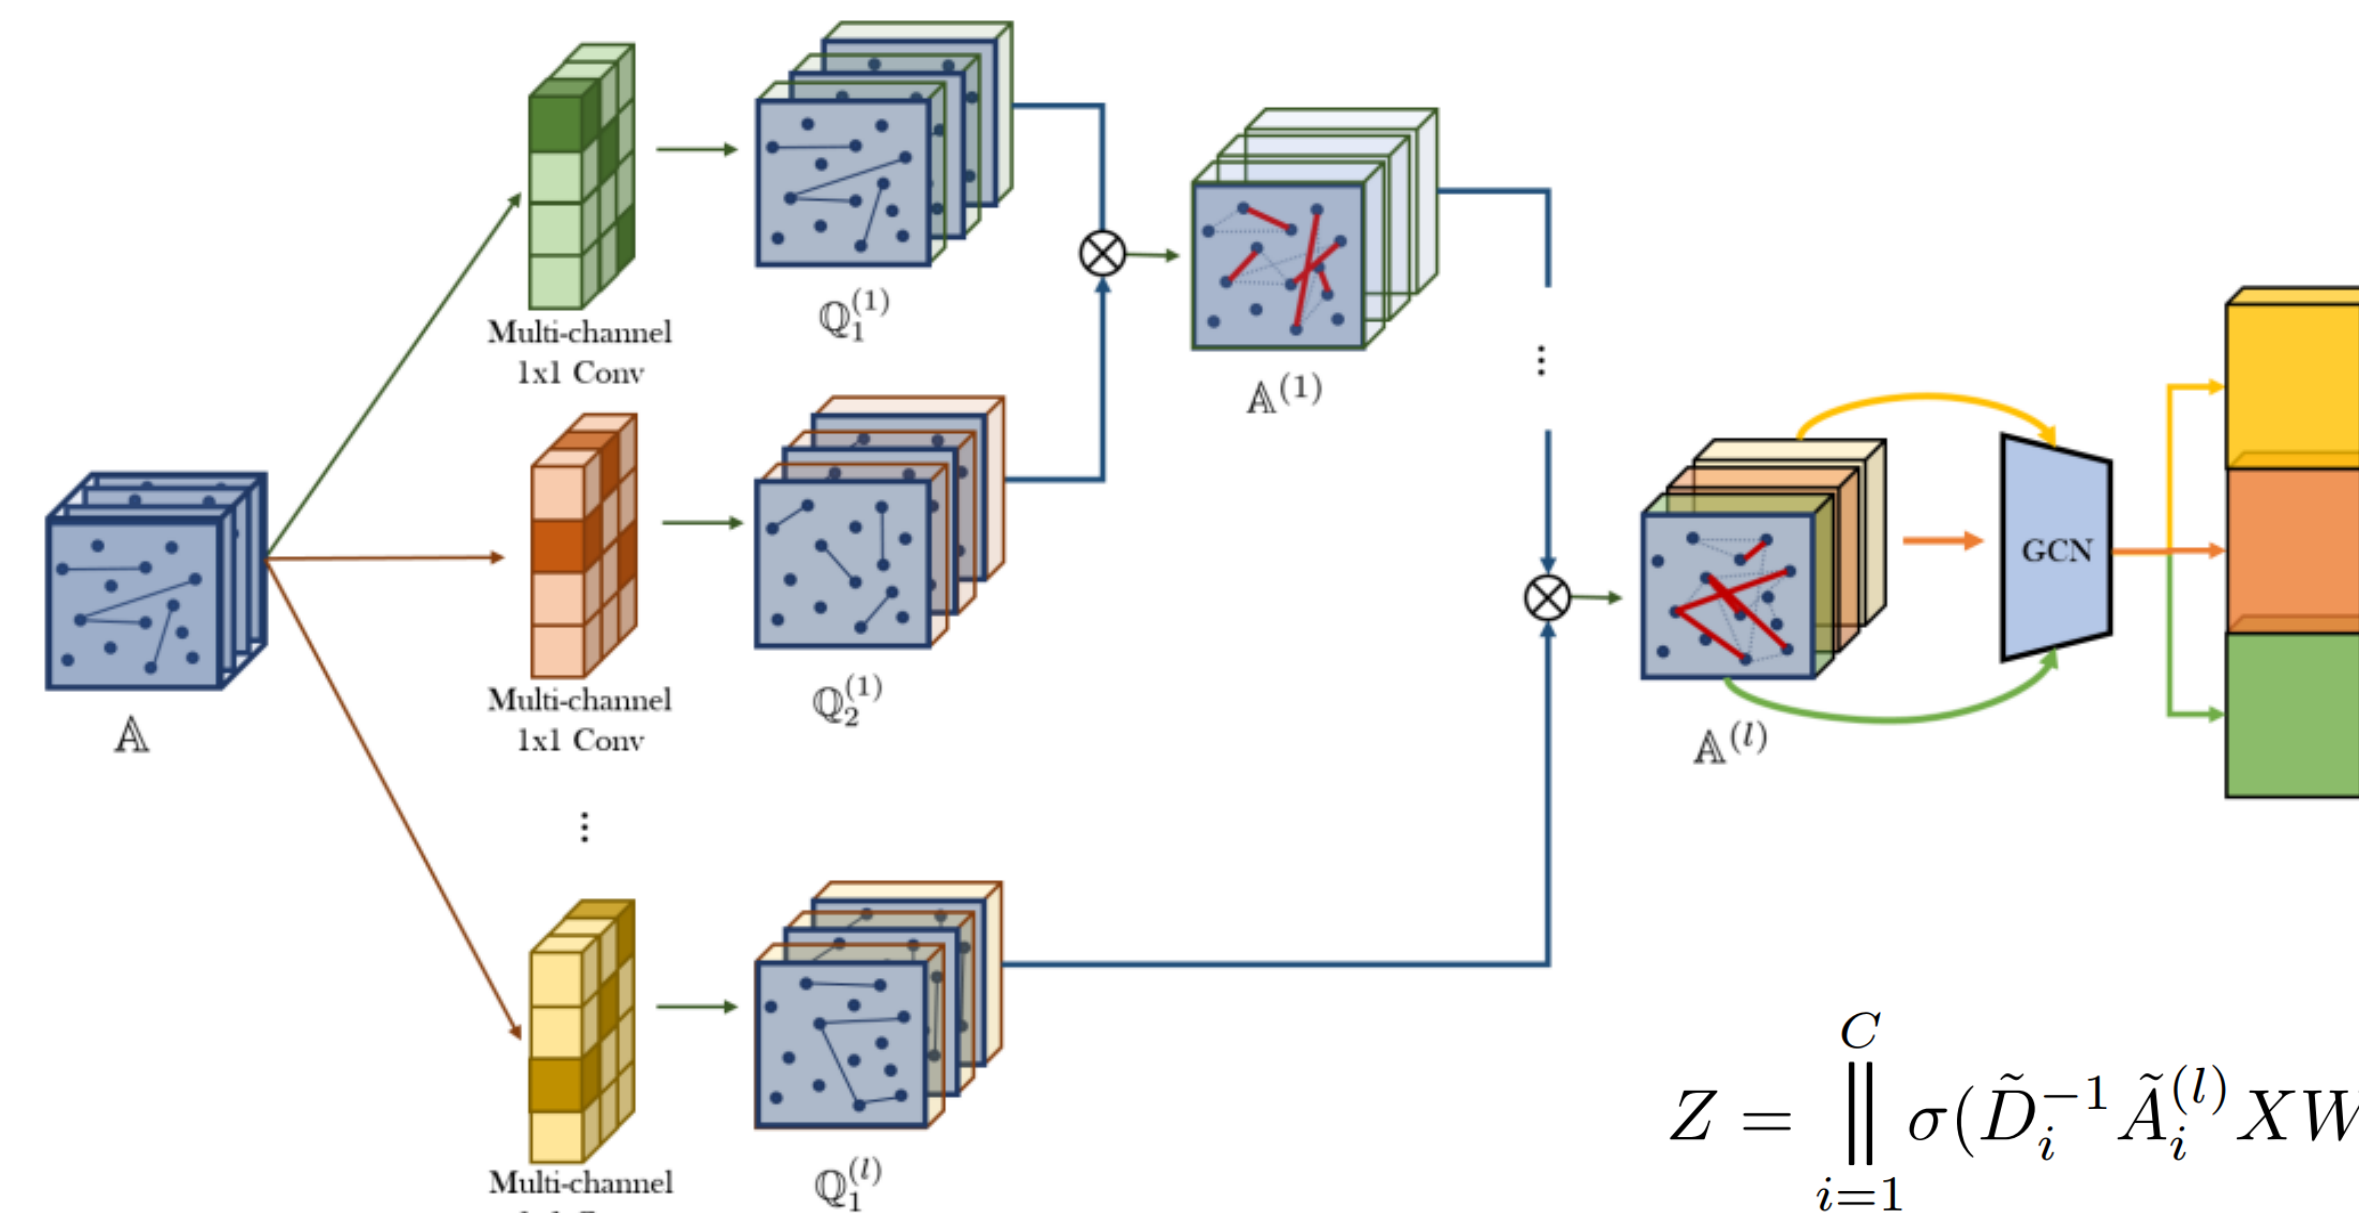

## Analysis

Q1) Are the new graph structures generated by GTN effective for learning node representation?

|      | DeepWalk | metapath2vec | GCN   | GAT   | HAN   | GTN <sub>-I</sub> | GTN (proposed) |
|------|----------|--------------|-------|-------|-------|-------------------|----------------|
| DBLP | 63.18    | 85.53        | 87.30 | 93.71 | 92.83 | 93.91             | <b>94.18</b>   |
| ACM  | 67.42    | 87.61        | 91.60 | 92.33 | 90.96 | 91.13             | <b>92.68</b>   |
| IMDB | 32.08    | 35.21        | 56.89 | 58.14 | 56.77 | 52.33             | <b>60.92</b>   |

Q2) Can GTN adaptively produce a variable length of meta-paths depending on datasets?

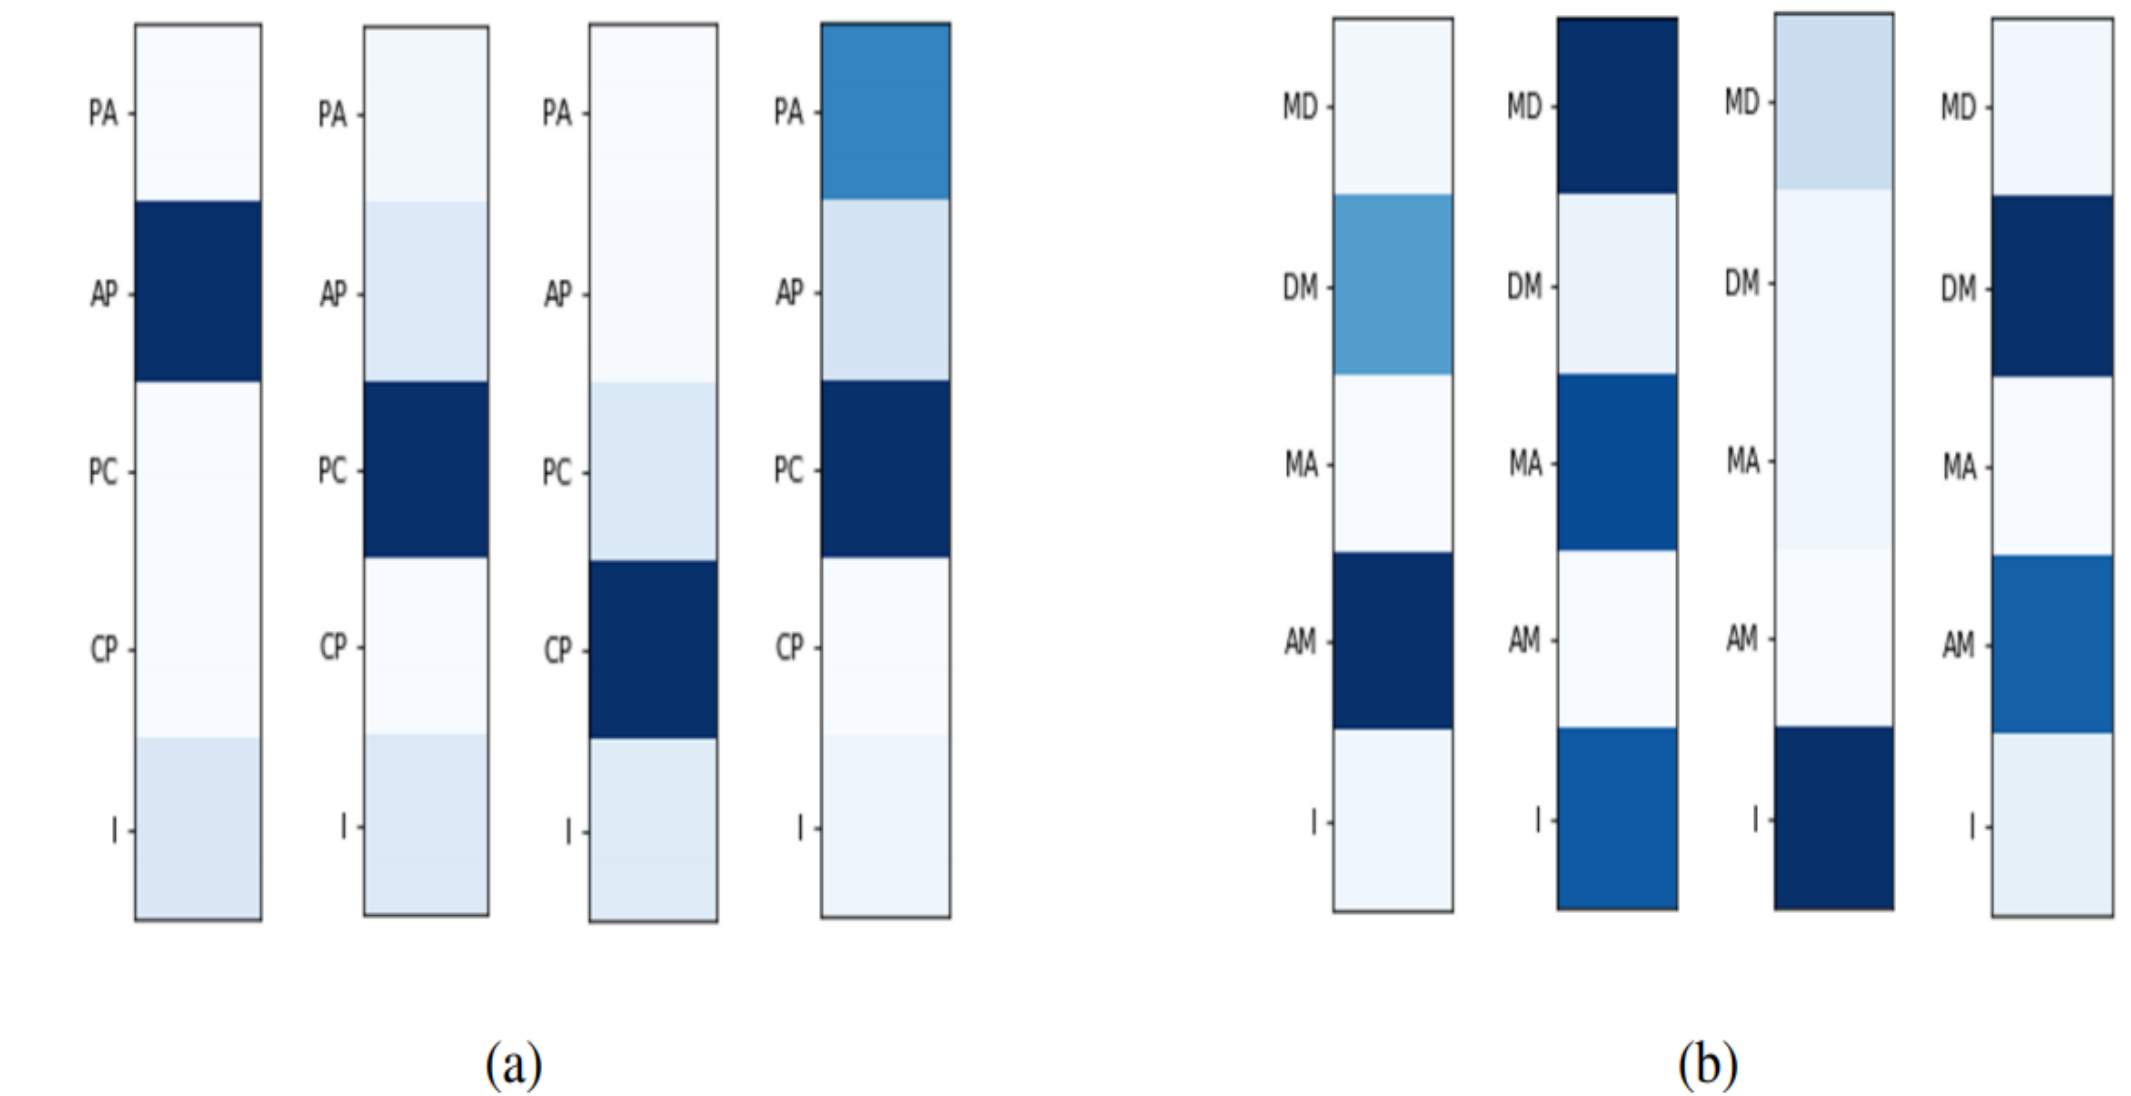

Q3) Can we interpret the importance of each meta-path from the adjacency matrix generated by GTNs?

| Dataset | Predefined Meta-path | Meta-path learnt by GTNs     |                  |
|---------|----------------------|------------------------------|------------------|
|         |                      | Top 3 (between target nodes) | Top 3 (all)      |
| DBLP    | APCPA, APA           | APCPA, APAPA, APA            | APCPC, APCPA, PC |
| ACM     | PAP, PSP             | PAP, PSP                     | PAPA, APA, PAPS  |
| IMDB    | MAM, MDM             | MDM, MAM, MDMDM              | DM, AM, MDM      |
