# Supplementary material
Source: ML conference proceedings conference paper supplement (https://proceedings.neurips.cc/paper_files/paper/2019/hash/9d63484abb477c97640154d40595a3bb-Abstract.html)
Supplement: Supplementary file [file 9d63484abb477c97640154d40595a3bb-Supplemental.zip]

# Graph Transformer Networks (NeurIPS 2019)

Seongjun Yun, Minbyul Jeong, Raehyun Kim, Jaewoo Kang, Hyunwoo J. Kim

## Spatial Transformer Networks

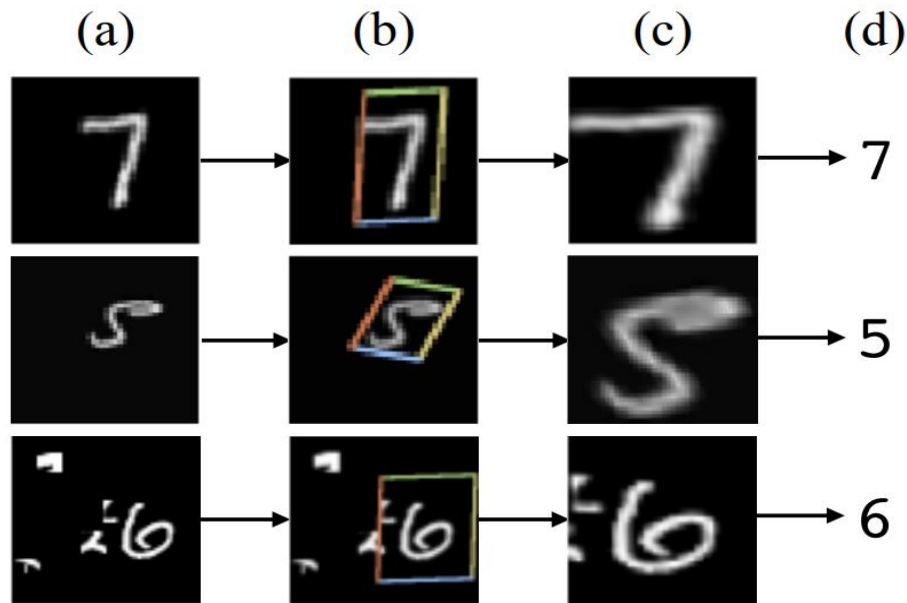

A spatial transformer that crops out and scale-normalizes the appropriate region can simplify the subsequent classification task, and lead to superior classification performance

## Heterogeneous Graph

Heterogeneous graph is a graph which contains different types of nodes and edges

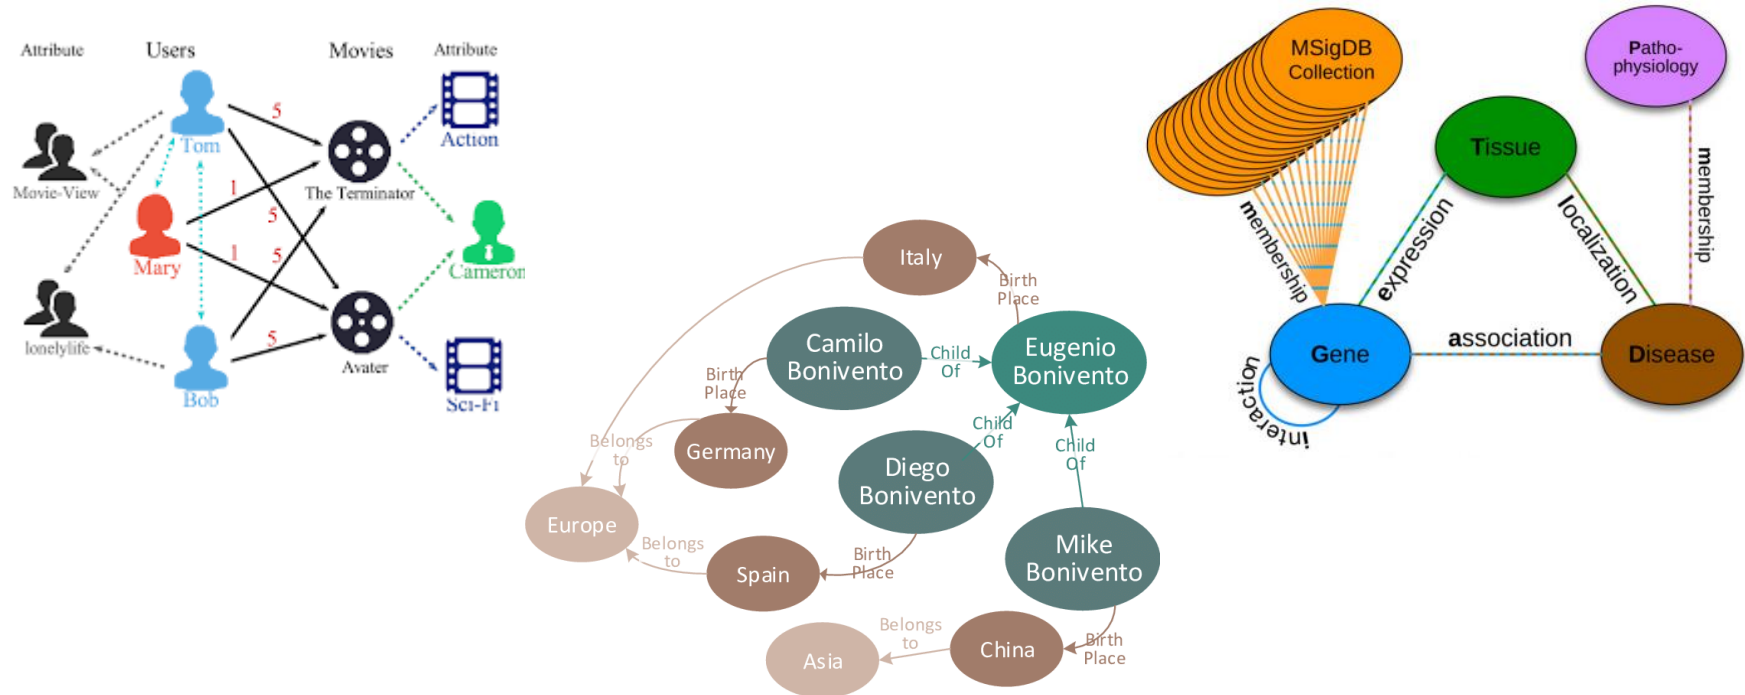

# Meta-path

A meta-path is a path consisting of a sequence of relations defined between different object types

| Datasets          | Examples of meta-path                                                                                                                                                                                                                                                                                                                                                                                                                                                                             |
|-------------------|---------------------------------------------------------------------------------------------------------------------------------------------------------------------------------------------------------------------------------------------------------------------------------------------------------------------------------------------------------------------------------------------------------------------------------------------------------------------------------------------------|
| BlogCatalog       | $\text{Blog} \xrightarrow{\text{has}} \text{Tag} \xrightarrow{\text{has}^{-1}} \text{Blog}$<br>$\text{Blog} \xrightarrow{\text{written.by}} \text{User} \xrightarrow{\text{written.by}^{-1}} \text{Blog}$<br>$\text{Blog} \xrightarrow{\text{written.by}} \text{User} \xrightarrow{\text{friend}} \text{User} \xrightarrow{\text{written.by}^{-1}} \text{Blog}$                                                                                                                                   |
| DBLP              | $\text{Paper} \xrightarrow{\text{has}} \text{Term} \xrightarrow{\text{has}^{-1}} \text{Paper}$<br>$\text{Paper} \xrightarrow{\text{written.by}} \text{Author} \xrightarrow{\text{written.by}^{-1}} \text{Paper}$<br>$\text{Paper} \xrightarrow{\text{written.by}} \text{Author} \xrightarrow{\text{written.by}^{-1}} \text{Paper} \xrightarrow{\text{has}} \text{Term} \xrightarrow{\text{has}^{-1}} \text{Paper}$                                                                                |
| Chemical Compound | $\text{Compound} \xrightarrow{\text{bind}} \text{Gene} \xrightarrow{\text{PPI}} \text{Gene} \xrightarrow{\text{bind}^{-1}} \text{Compound}$<br>$\text{Compound} \xrightarrow{\text{treat}} \text{Disease} \xrightarrow{\text{cause}^{-1}} \text{Gene} \xrightarrow{\text{bind}^{-1}} \text{Compound}$<br>$\text{Compound} \xrightarrow{\text{bind}} \text{Gene} \xrightarrow{\text{has}} \text{Pathway} \xrightarrow{\text{has}^{-1}} \text{Gene} \xrightarrow{\text{bind}^{-1}} \text{Compound}$ |

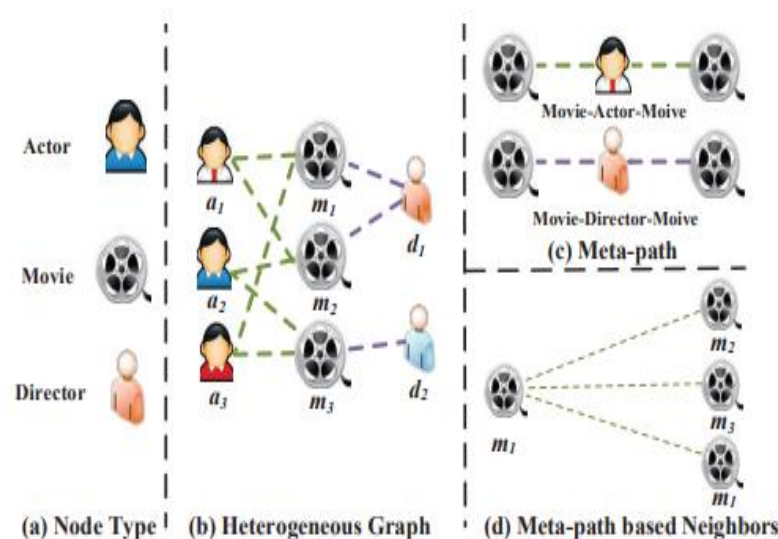

# Transform a Graph into new Graphs using Meta-Paths

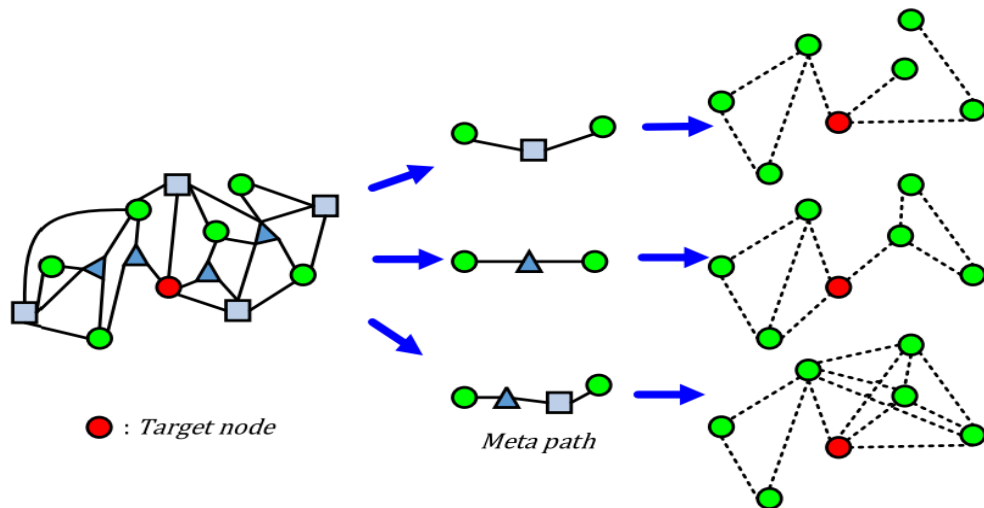

Previous works about graph neural networks leveraged useful meta-path which selected **manually** by domain experts.

# Transform a Graph into new Graphs using Meta-Paths



Previous works about graph neural networks leveraged useful meta-path which selected **manually by domain experts**.

Can model **learn to transform** an original graph into a new graph which involves only useful connections for task?

# Multiplication of Adjacency Matrices for Generating Meta-Paths

Edge Type: A,B

Graph

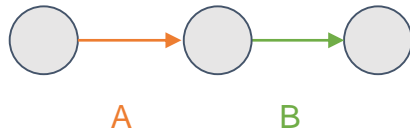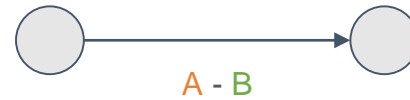

Adjacency  
Matrix

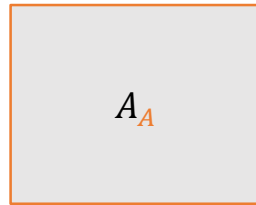

X

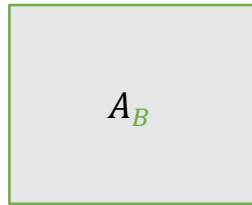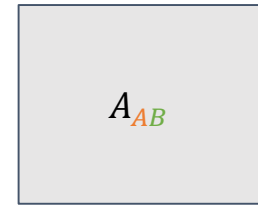

## Graph Transformer Layer

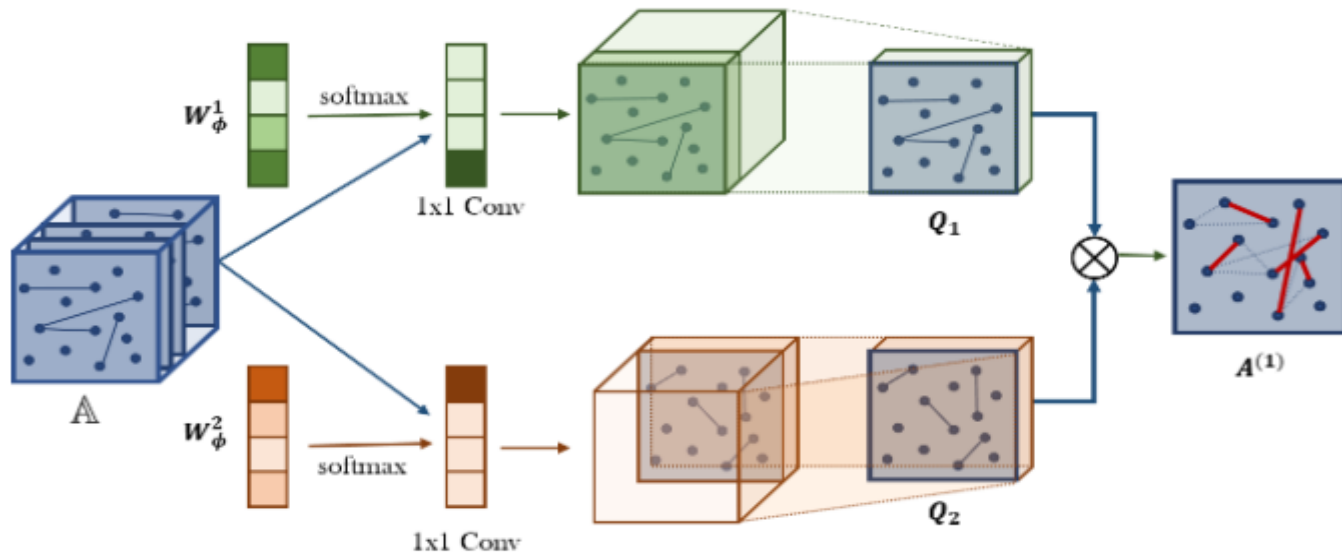

Graph Transformer Layer (GTL) softly **selects adjacency matrices** (edge types) from the set of adjacency matrices and **generate** a new meta-path graph via the **matrix multiplication** of two selected adjacency matrices.

# Graph Transformer Networks

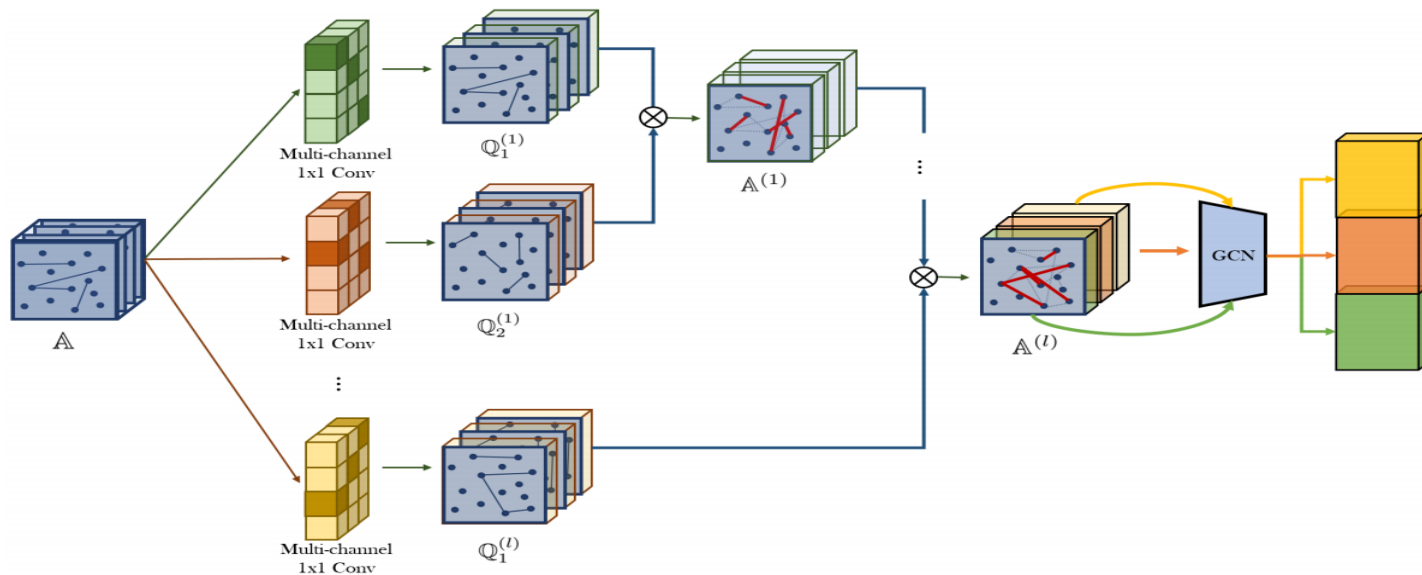

Graph Transformer Networks (GTNs) learn to **generate a set of new meta-path adjacency matrices** using GT layers and perform graph convolution as in GCNs on the new graph structures.

Q1) Are the new graph structures generated by GTN effective for learning node representation?

| Dataset | # Nodes | # Edges | # Edge type | # Features | # Training | # Validation | # Test |
|---------|---------|---------|-------------|------------|------------|--------------|--------|
| DBLP    | 18405   | 67946   | 4           | 334        | 800        | 400          | 2857   |
| ACM     | 8994    | 25922   | 4           | 1902       | 600        | 300          | 2125   |
| IMDB    | 12624   | 37288   | 4           | 1256       | 300        | 300          | 2339   |

|      | DeepWalk | metapath2vec | GCN   | GAT   | HAN   | GTN <sub>-I</sub> | GTN (proposed) |
|------|----------|--------------|-------|-------|-------|-------------------|----------------|
| DBLP | 63.18    | 85.53        | 87.30 | 93.71 | 92.83 | 93.91             | <b>94.18</b>   |
| ACM  | 67.42    | 87.61        | 91.60 | 92.33 | 90.96 | 91.13             | <b>92.68</b>   |
| IMDB | 32.08    | 35.21        | 56.89 | 58.14 | 56.77 | 52.33             | <b>60.92</b>   |

- Graph Transformer Networks (GTNs) achieves the **highest performance** on all the datasets against all network embedding methods and graph neural network methods
- GTNs performs **better** than HAN which uses the **pre-defined meta paths**.

Q2) Can GTN adaptively produce a variable length of meta-paths depending on datasets?

The attention score of adjacency matrix (edge type) from each Graph Transformer Layer

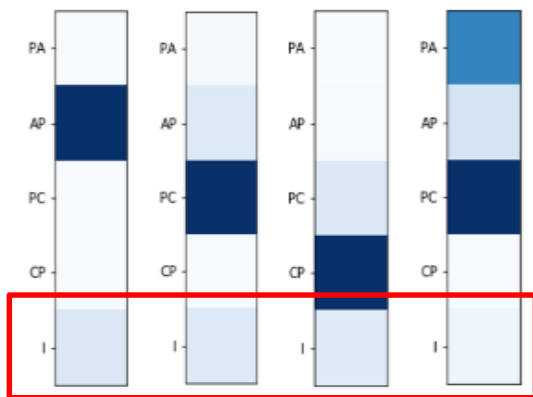

(a)  
DBLP

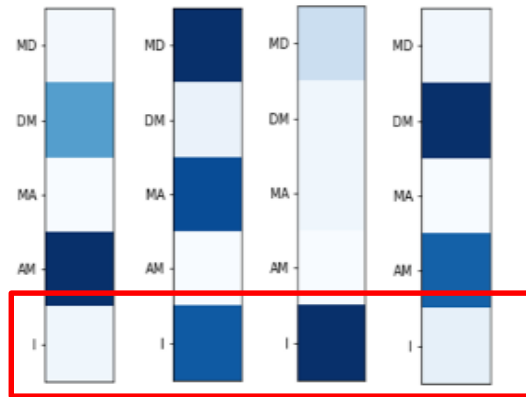

(b)  
IMDB

- By assigning **higher** attention scores to **the identity matrix (I)**, GTN tries to stick to the shorter meta-paths even in the deeper layer.
- GTN has ability to **adaptively learn most effective meta-path length** depending on the dataset

Q3) How can we interpret the importance of each meta-path from the adjacency matrix generated by GTNs?

Comparison with predefined paths and top-ranked meta-paths by GTNs

| Dataset | Predefined<br>Meta-path | Meta-path learnt by GTNs     |                  |
|---------|-------------------------|------------------------------|------------------|
|         |                         | Top 3 (between target nodes) | Top 3 (all)      |
| DBLP    | APCPA, APA              | APCPA, APAPA, APA            | APCPC, APCPA, PC |
| ACM     | PAP, PSP                | PAP, PSP                     | PAPA, APA, PAPS  |
| IMDB    | MAM, MDM                | MDM, MAM, MDMDM              | DM, AM, MDM      |

- The predefined meta-paths by domain knowledge are consistently top-ranked by GTNs as well.
- Our GTNs are capable to learn the importance of meta-paths for tasks

## Scalability

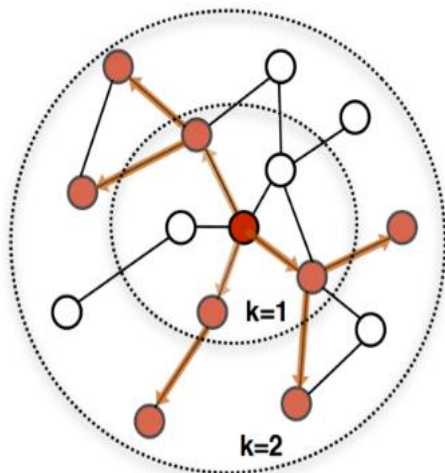

1. Sample neighborhood

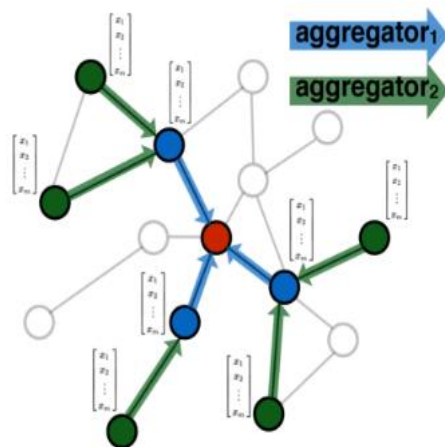

2. Aggregate feature information from neighbors

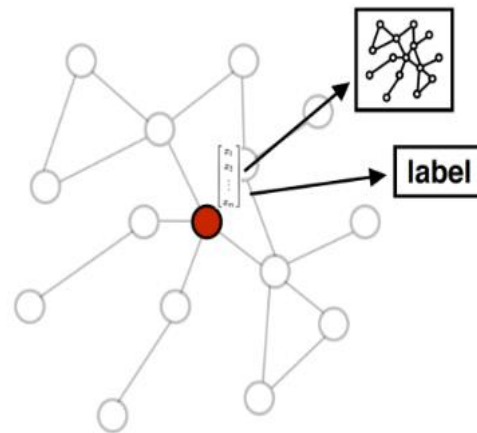

3. Predict graph context and label using aggregated information
